# Supplementary material
Source: PubMed Central journal article supplement (PMC11215369)
Supplement: bcd-23-0268_figure_s1_suppsf1.pdf [file bcd-23-0268_figure_s1_suppsf1.pdf]

**Figure S1**

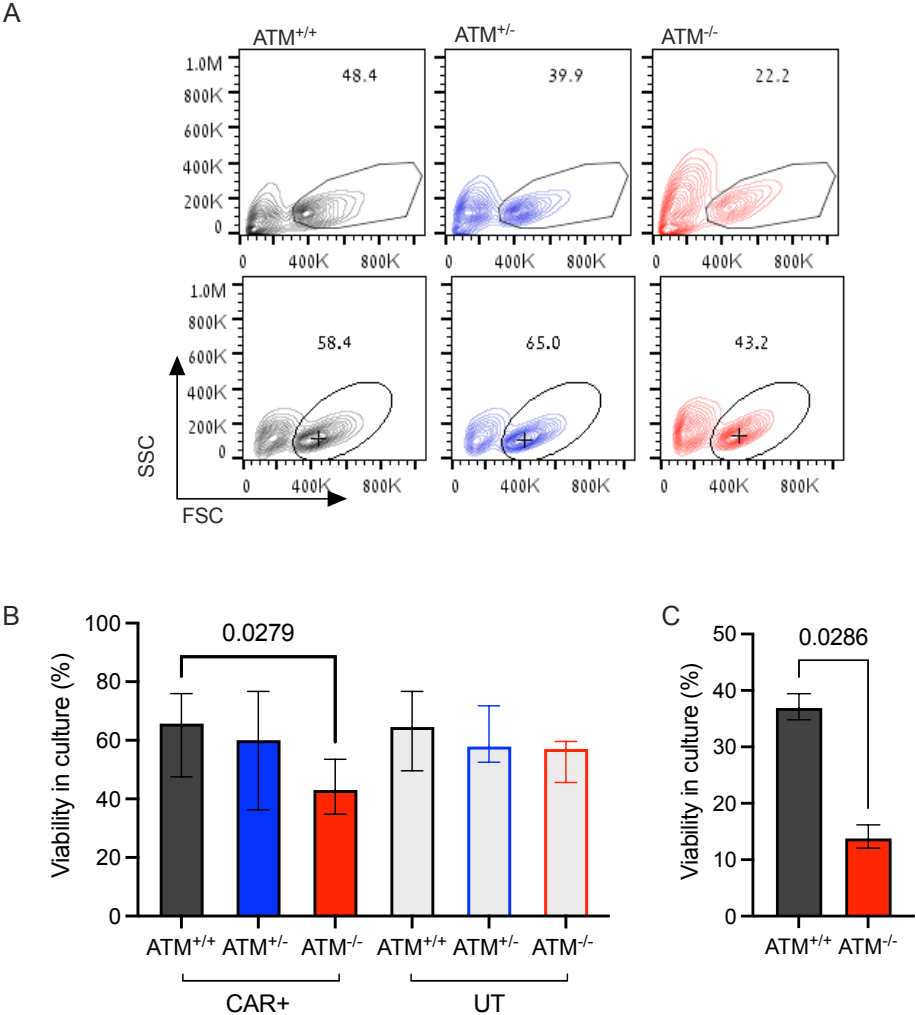

**Legend to Figure S1:** Viability of CAR-T cells from  $ATM^{+/+}$ ,  $ATM^{+/-}$  and  $ATM^{-/-}$  donors at the end of production: CAR-T cells from healthy donor products ( $ATM^{+/+}$ , grey), heterozygous  $ATM^{+/-}$  products (blue),  $ATM^{-/-}$  products (red) or untransduced controls (UT) at the end of a 10-day culture period (n=4 products from individual donors per each genotype). (A) Representative flow cytometry plots of SSC and FSC of cells from different donor triplets shown. (B) Viability, measured by 7AAD staining (flow cytometry), is shown for CAR+ or untransduced (UT) cells from  $ATM^{+/+}$ ,  $ATM^{+/-}$  and  $ATM^{-/-}$  products. (C) CAR-T cells from  $ATM^{+/+}$  and  $ATM^{-/-}$  donors were grown for 10 days in co-culture with addition of Nalm6 cells every 2 days at ratio of 1:1. Viability is shown using 7AAD staining gated on CD3+ CAR+ cells at the end of co-culture (n=4 samples in each genotype). Error bars indicate interquartile range. P values are calculated using non-parametric Mann Whitney test. Only p-values <0.05 are shown.
