# Supplementary material
Source: PubMed Central journal article supplement (PMC11215369)
Supplement: bcd-23-0268_figure_s2_suppsf2.pdf [file bcd-23-0268_figure_s2_suppsf2.pdf]

Figure S2

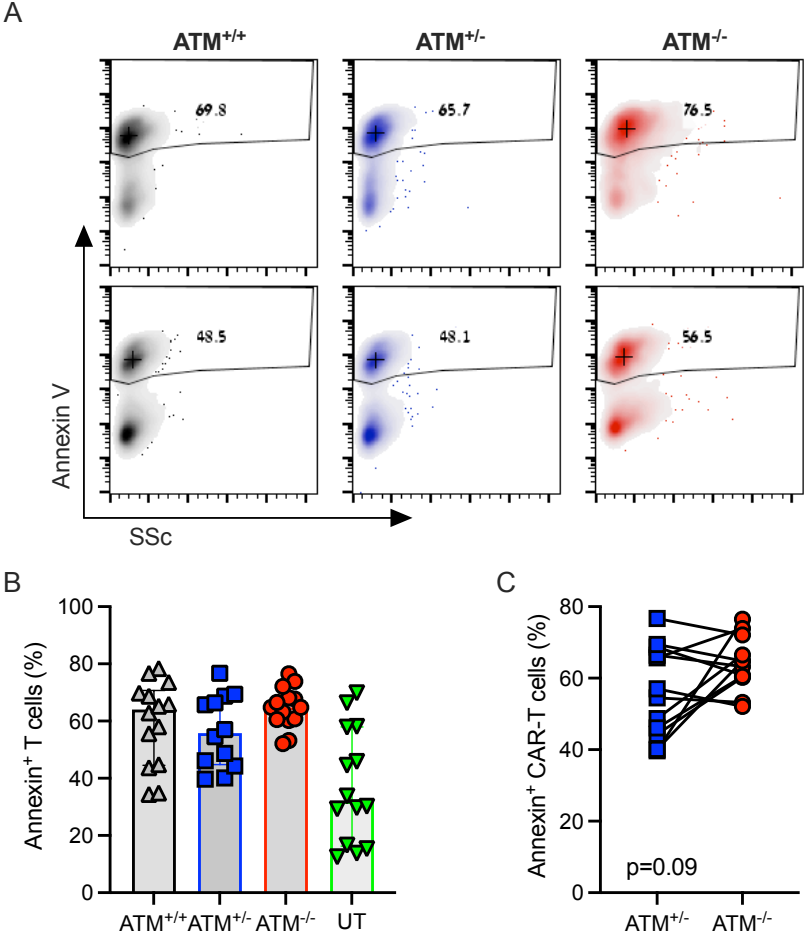

**Legend to Figure S2:** CD19-CAR-T cells from healthy donor products (*ATM*<sup>+/+</sup>, grey), heterozygous *ATM*<sup>+/-</sup> products (blue), *ATM*<sup>-/-</sup> products (red) or untransduced controls after incubation with CD19+\_target Nalm6 ALL cells for 2.5 hours (as in figure 2A). (A) Representative plots of Annexin V staining gated on CAR+ cells in *ATM*<sup>+/+</sup>, *ATM*<sup>+/-</sup>, and *ATM*<sup>-/-</sup> CAR-T products (top row) or untransduced cells (bottom row). (B) Annexin V levels in all products assessed. Each dot represents an individual sample. Bars represent the median, and whiskers the interquartile range. (C) Paired analysis of *ATM*<sup>+/-</sup> heterozygous donors and *ATM*<sup>-/-</sup> family members (n=12 samples from each genotype). Paired t-test was used to calculate the p-value. UT=untransduced.
