# Supplementary material
Source: PubMed Central journal article supplement (PMC11215369)
Supplement: bcd-23-0268_figure_s3_suppsf3.pdf [file bcd-23-0268_figure_s3_suppsf3.pdf]

**Figure S3**

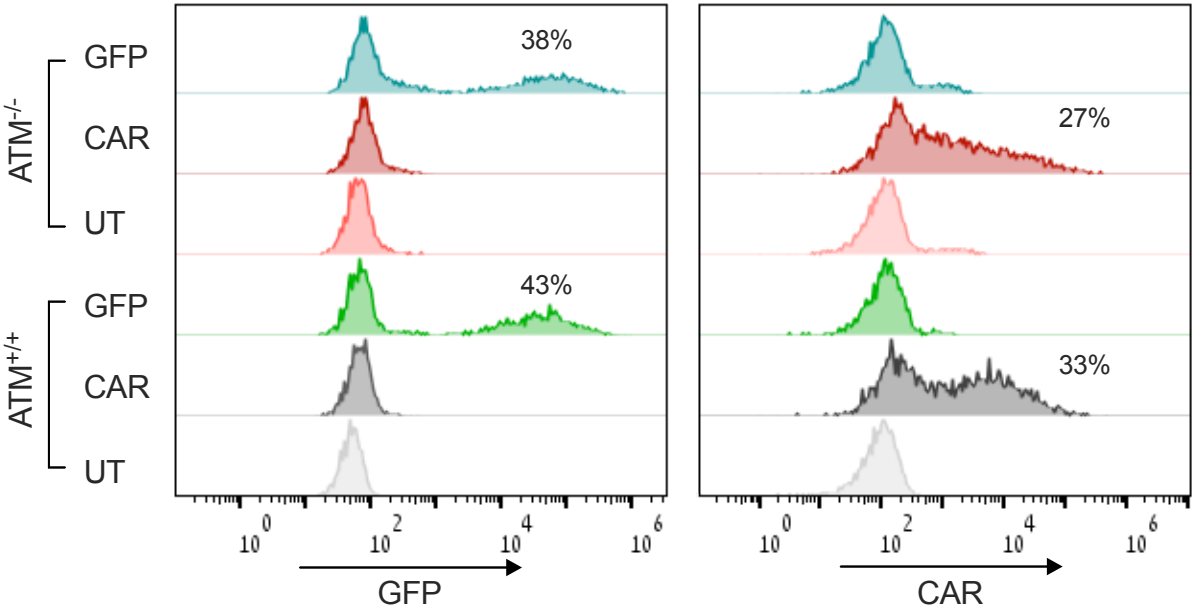

**Legend to Figure S3:** Thawed previously activated  $ATM^{-/-}$  T-cells (from AT08 donor) and healthy-donor control ( $ATM^{+/+}$ ) were re-activated using OKT3 and followed by retroviral transduction with MSGV encoding either GFP or CD19-CAR. Flow cytometry of products of GFP-transduced, CAR-transduced or untransduced (UT) cells are shown on day 7 after activation. Flow cytometry histogram plots of GFP (left, FL1) and CAR (right, FL6) transduction of products gated on viable cells (using SSC/FSC gating). Number of positive cells for GFP (left) and CAR (right) is shown in percentages.
