# Supplementary material
Source: PubMed Central journal article supplement (PMC11215369)
Supplement: bcd-23-0268_figure_s4_suppsf4.pdf [file bcd-23-0268_figure_s4_suppsf4.pdf]

**Figure S4**

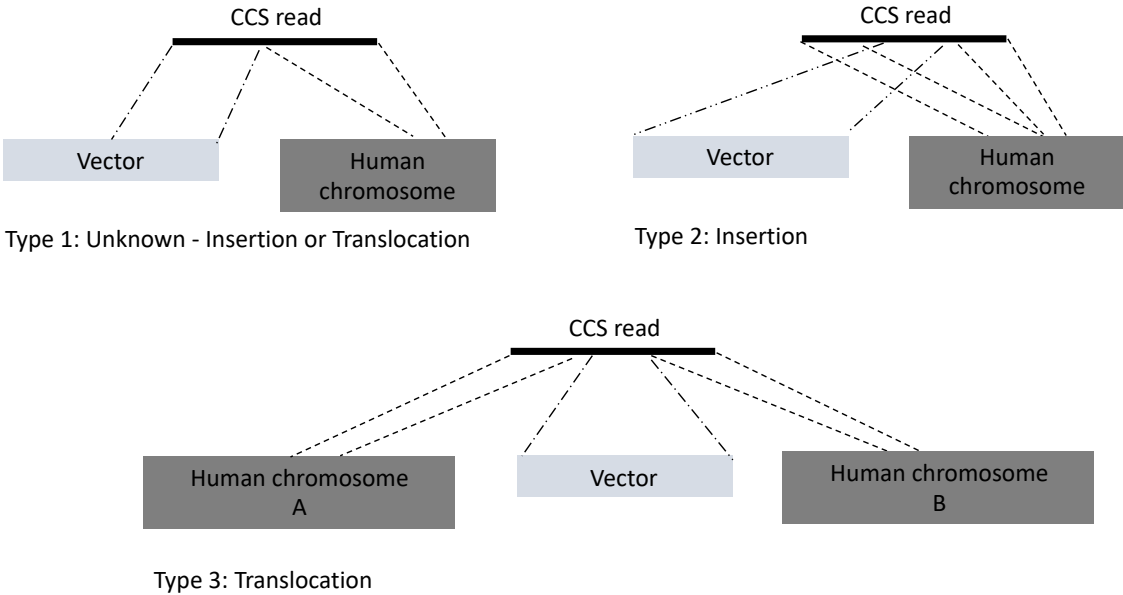

**Legend to Figure S4:** Illustration demonstrating structure of different type of reads aligned to the CAR vector. CCS= circular consensus sequencing. Findings are detailed in Table S1.
