# Supplementary material
Source: PubMed Central journal article supplement (PMC11215369)
Supplement: bcd-23-0268_figure_s5_suppsf5.pdf [file bcd-23-0268_figure_s5_suppsf5.pdf]

**Figure S5**

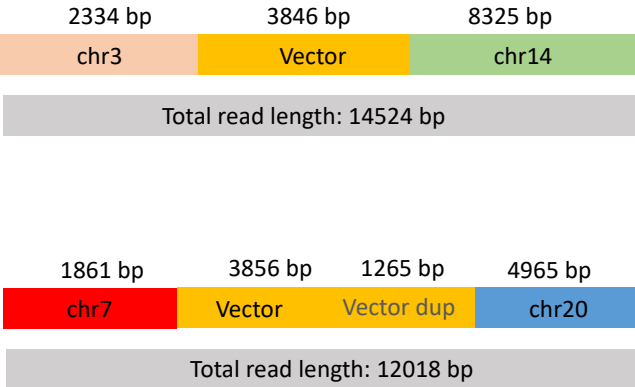

**Legend to Figure S5:** Illustration demonstrating structure of two reads supporting vector-related translocation: CAR integration within a translocation between chromosomes 3 and 14 (detailed in Fig. 5) and a CAR integration within a translocation between chromosomes 7 and 20, along with duplication of the CAR.
